# Supplementary material for: Constrained evolution of a bispecific enzyme: lessons for biocatalyst design
Source: Royal Society of Chemistry journal article supplement (doi:10.1039/c6ob02355j), 2016-12-21
Supplement: c6ob02355j1.pdf [file c6ob02355j1.pdf]

## **Supporting Information**

### **Constrained evolution of a bispecific enzyme: lessons for biocatalyst design**

E. Sugrue,<sup>a</sup> Colin Scott,<sup>b</sup> C. J. Jackson<sup>a\*</sup>

<sup>a</sup>Research School of Chemistry, Australian National University, Canberra, Australia. E-mail:  
colin.jackson@anu.edu.au

**Table 1** Impact of individual mutations on the thermostability and kinetic parameters of TrzN with atrazine and ametryn when compared to the *Nocardioide*s sp. strain AN3 background.

| Mutation | Background |        |        | Fold-change <sup>a</sup> |                                 | Absolute change in T <sub>m</sub> (°C) |
|----------|------------|--------|--------|--------------------------|---------------------------------|----------------------------------------|
|          |            |        |        | Atrazine hydrolysis      | Ametryn hydrolysis <sup>b</sup> |                                        |
| Tyr67    | -          | -      | -      | -2                       | N/A <sup>c</sup>                | 4.7                                    |
|          | Pro214     | -      | -      |                          | †                               |                                        |
|          | -          | Tyr215 | -      | -1                       | N/A                             | 4.4                                    |
|          | -          | -      | Glu241 |                          | †                               |                                        |
|          | Pro214     | Tyr215 | -      | -1                       | N/A                             | 2.1                                    |
|          | Pro214     | -      | Glu241 |                          | †                               |                                        |
|          | -          | Tyr215 | Glu241 | -3                       | 0                               | 5.6                                    |
|          | Pro214     | Tyr215 | Glu241 | -5                       | 0                               | 6.5                                    |
| Pro214   | -          | -      | -      | -2                       | N/A                             | -1.6                                   |
|          | Tyr67      | -      | -      |                          | †                               |                                        |
|          | -          | Tyr215 | -      | 0                        | N/A                             | 1.7                                    |
|          | -          | -      | Glu241 |                          | †                               |                                        |
|          | Tyr67      | Tyr215 | -      | 0                        | N/A                             | 0.2                                    |
|          | Tyr67      | -      | Glu241 |                          | †                               |                                        |
|          | -          | Tyr215 | Glu241 | 1                        | 2                               | -1.2                                   |
|          | Tyr67      | Tyr215 | Glu241 | 0                        | 2                               | -0.3                                   |
| Tyr215   | -          | -      | -      | -2                       | N/A                             | -2.3                                   |
|          | Tyr67      | -      | -      | 0                        | N/A                             | -2.6                                   |
|          | -          | Pro214 | -      | 0                        | N/A                             | 2.6                                    |
|          | -          | -      | Glu241 | -6                       | 2                               | -1.5                                   |
|          | Tyr67      | Pro214 | -      |                          | †                               |                                        |
|          | Tyr67      | -      | Glu241 |                          | †                               |                                        |
|          | -          | Pro214 | Glu241 |                          | †                               |                                        |
|          | Tyr67      | Pro214 | Glu241 |                          | †                               |                                        |
| Glu241   | -          | -      | -      | 7                        | 38000                           | -7.1                                   |
|          | Tyr67      | -      | -      |                          | †                               |                                        |
|          | -          | Pro214 | -      |                          | †                               |                                        |
|          | -          | -      | Tyr215 | 3                        | 57000                           | -6.3                                   |
|          | Tyr67      | Pro214 | -      |                          | †                               |                                        |
|          | Tyr67      | -      | Tyr215 | 1                        | 53000                           | -5.1                                   |
|          | -          | Pro214 | Tyr215 | 5                        | 89000                           | -10.0                                  |
|          | Tyr67      | Pro214 | Tyr215 | 1                        | 91000                           | -5.6                                   |

†One of the proteins does not express

<sup>a</sup>Fold-change when compared to the *Nocardioide*s sp. strain AN3 background. Grey indicates negative change, yellow neutral, and green positive.

<sup>b</sup>Fold-change in activity when compared to the assay detection limit

<sup>c</sup>Not applicable

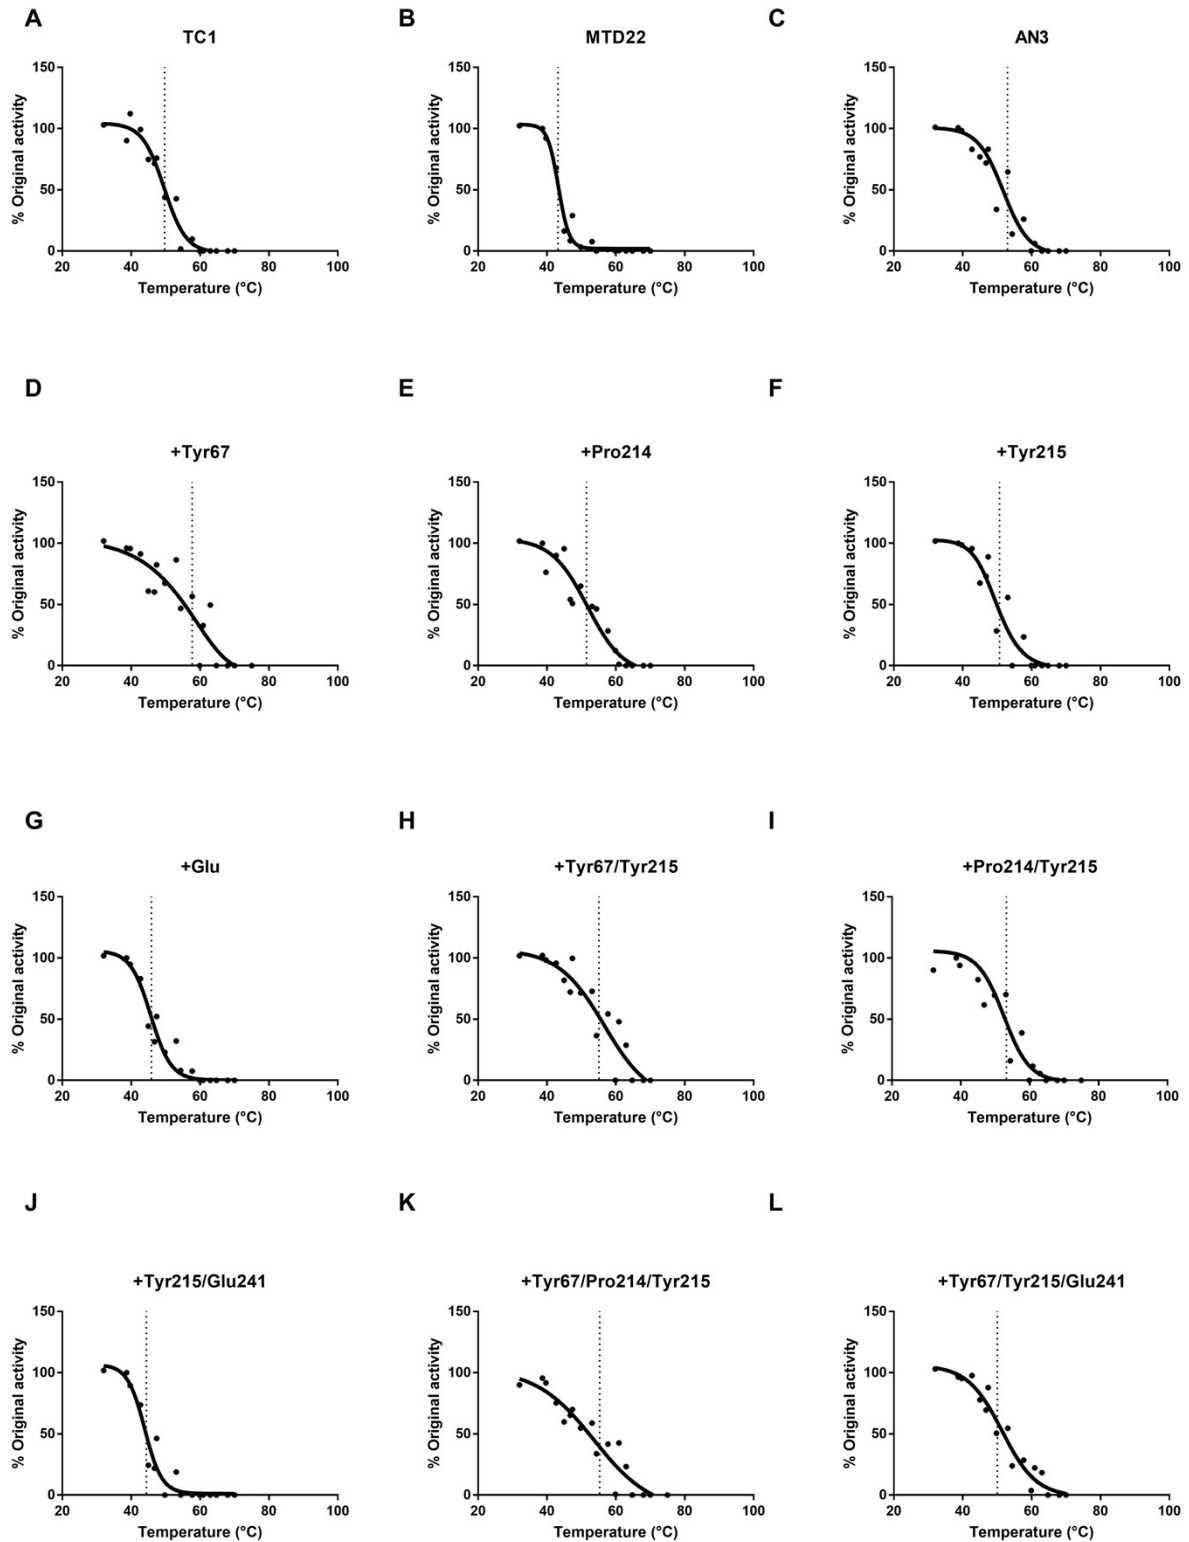

**Figure 1** Representative replicates of thermostability assay curves used to calculate the  $T_m$  of variants. *Arthrobacter aurescens* strain TC1 TrzN, *Nocardioides* sp. strains MTD22 TrzN, and AN3 TrzN are shown from A-C, the remainder of soluble variants from D-L. The  $T_m$  (°C) calculated from three independent replicates is indicated with a dotted line.

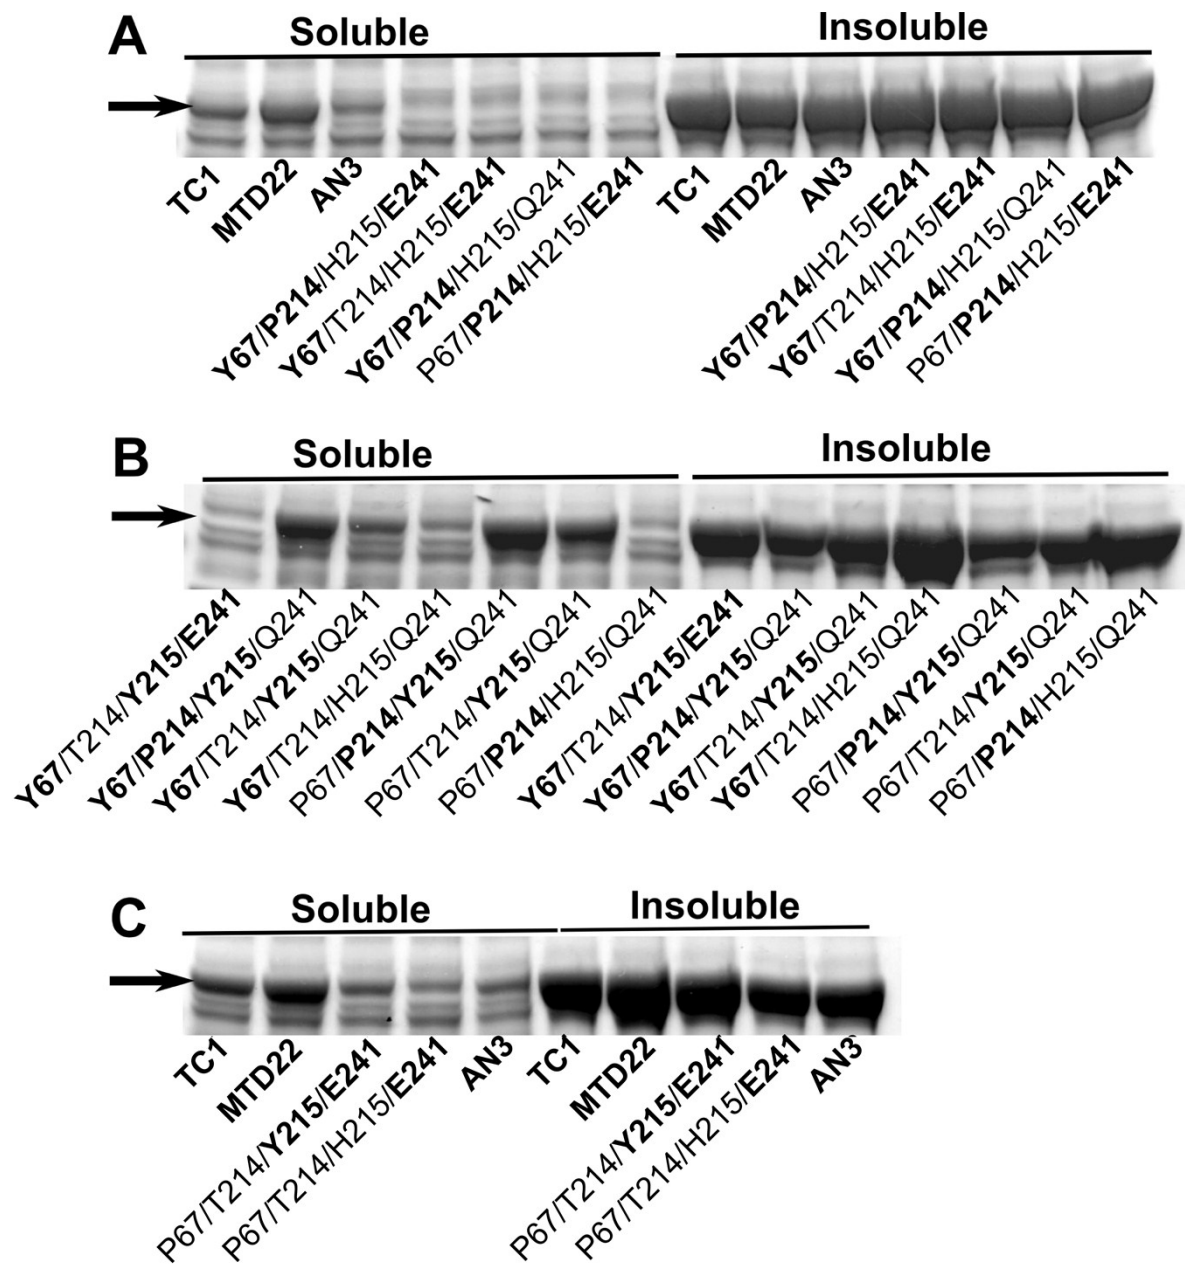

**Figure 2 (A)** Four variants were unable to be solubly expressed compared to *Arthrobacter aurescens* strain TC1 TrzN, *Nocardioides* sp. strains MTD22 TrzN, and AN3 TrzN, which exhibit soluble expression. **Tyr67/Pro214/His215/Glu241 TrzN, Tyr67/Thr214/His215/Glu241, Tyr67/Pro214/His215/Gln241, and Phe67/Pro214/His215/Glu241** show no soluble expression but substantial insoluble expression. **(B)** Soluble expression is much higher in the presence of Gln241. **(C)** Addition of Glu241 is observed to decrease expression.

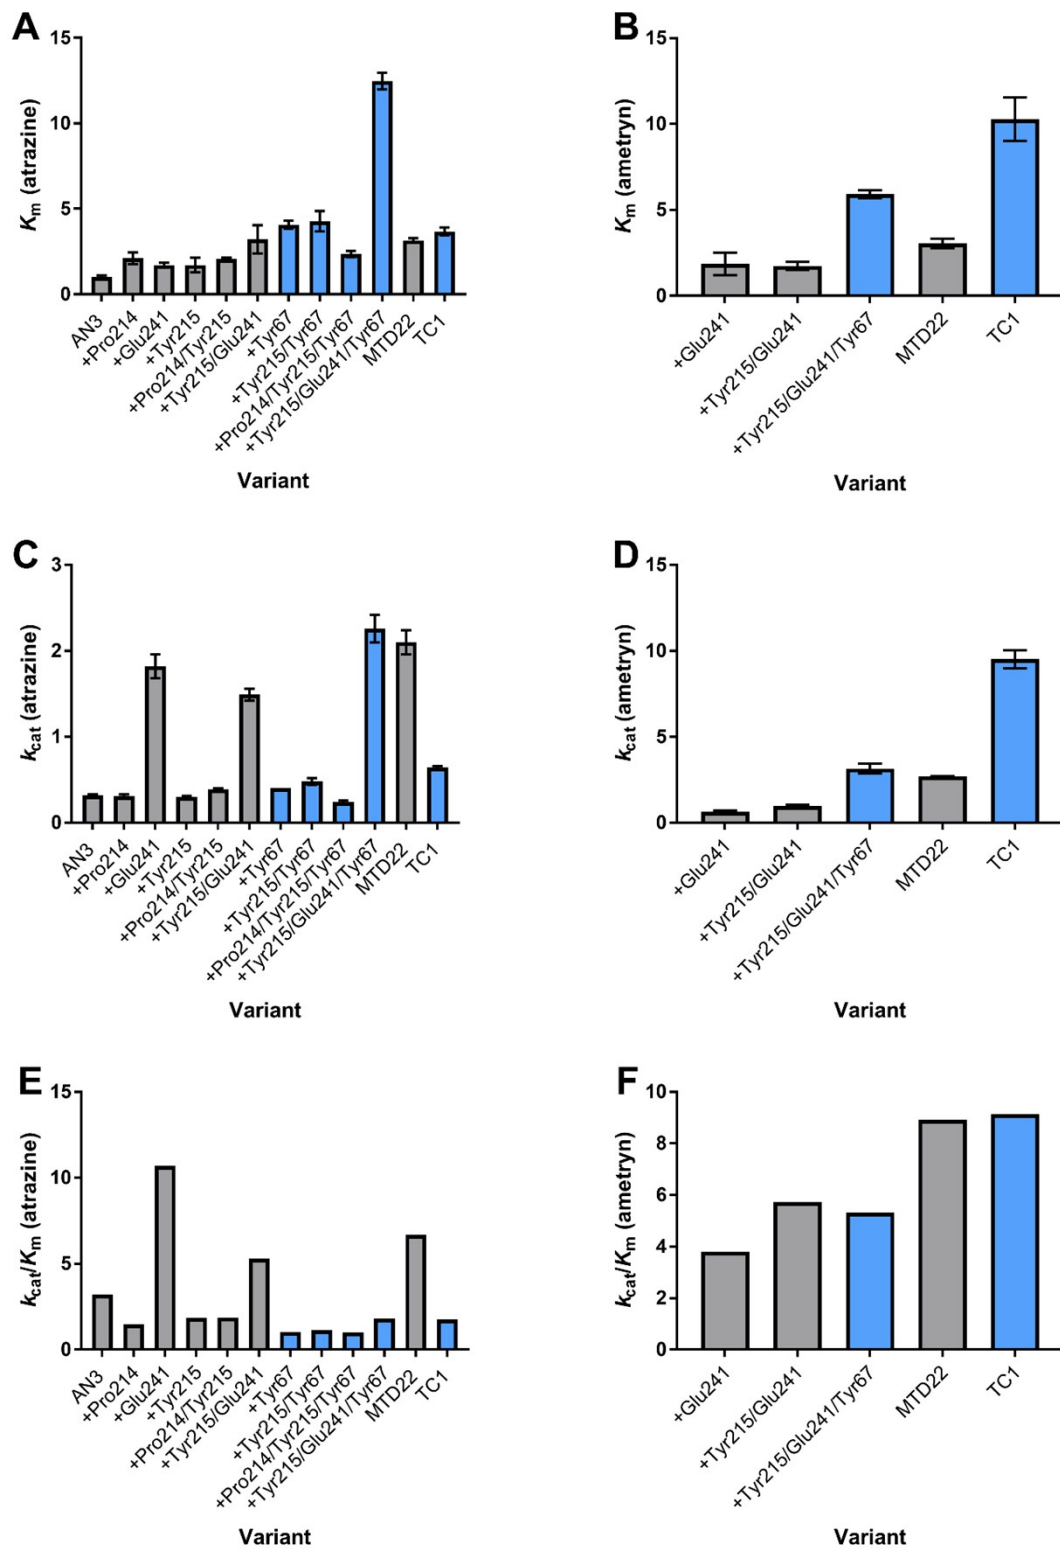

**Figure 3** Modification of Phe67 to Tyr67 is observed to change the kinetic parameters of all TrzN variants. Modification of Phe67 to Tyr67 (blue bars) increases the  $K_m$  with both atrazine (**A**) and ametryn (**B**) independent of pre-existing mutations. Addition of Tyr67 is also observed to increase the  $k_{cat}$  with atrazine (**C**) and ametryn (**D**) in some genetic backgrounds. Overall, the  $k_{cat}/K_m$  with atrazine is observed to be reduced in Tyr67 containing variants (**E**) whereas the  $k_{cat}/K_m$  with ametryn is observed to be generally unchanged (**F**)

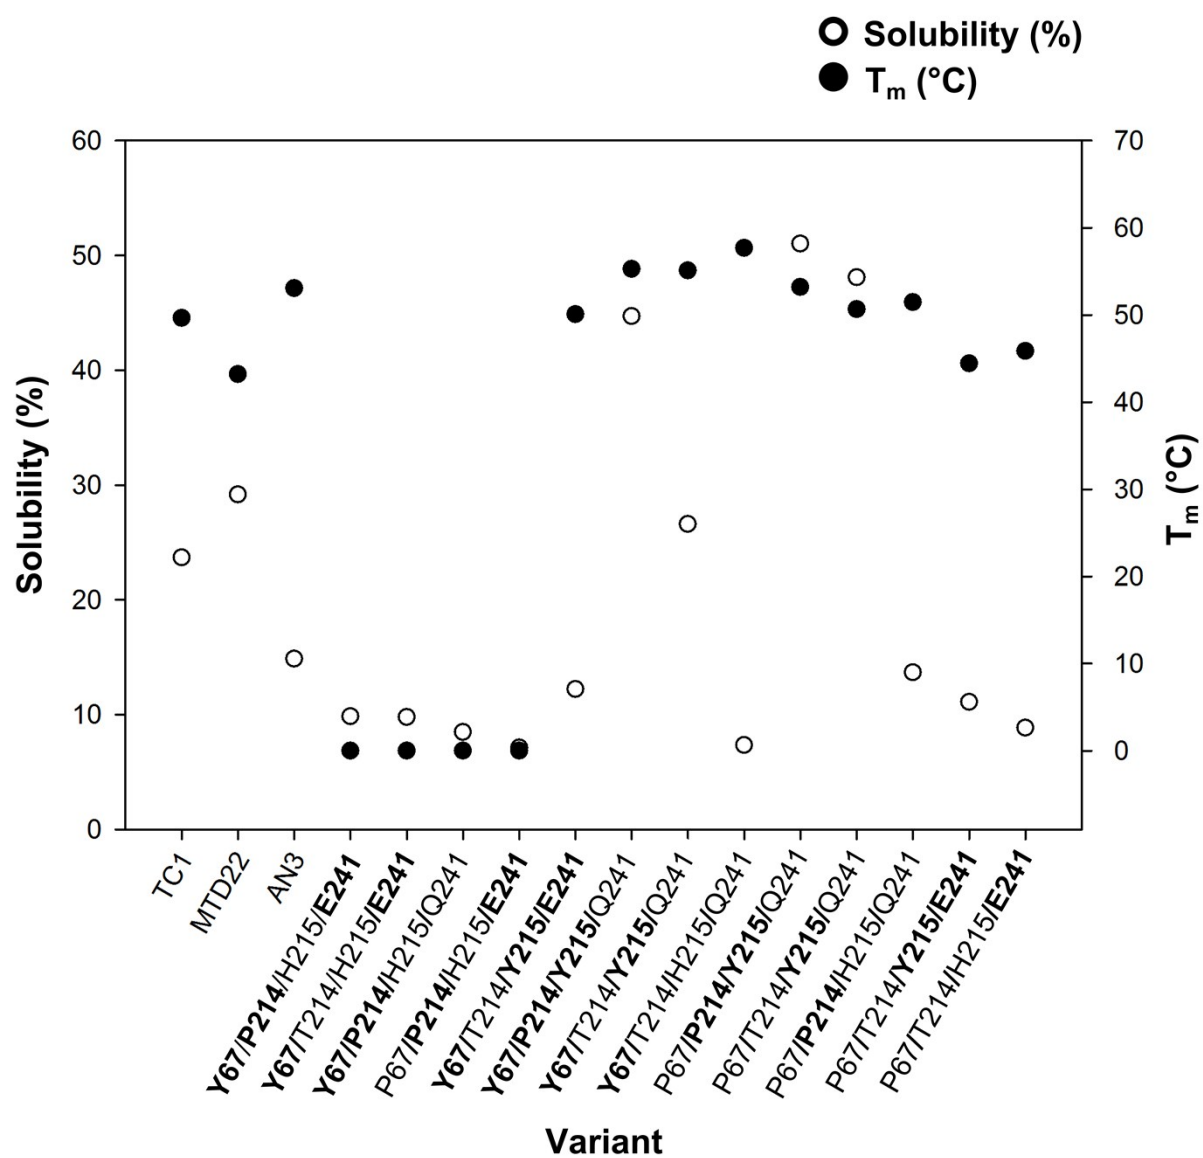

**Figure 4** The soluble expression (○) and thermostability (●) of different TrzN variants.
